# Supplementary material for: Multiplex PCR Targeted Amplicon Sequencing (MTA-Seq): Simple, Flexible, and Versatile SNP Genotyping by Highly Multiplexed PCR Amplicon Sequencing
Source: Front Plant Sci. 2018 Mar 23;9:201. doi: 10.3389/fpls.2018.00201 (PMC5876661; doi:10.3389/fpls.2018.00201)
Supplement: Supplementary file 4 [file Table4.xlsx]

## Sheet: Table S4
	Table S4. Detailed result of simulation study of SNP calling.
	Accession	Number of randomely sampled reads	Number of reads on 443 SNP markers	Theoretical genotype		Average number of genotypes identified from 443 SNP markers and its rate (± s.d.)
						AA						AB						BB						NC
						AA	s.d.		%	s.d.		AB	s.d.		%	s.d.		BB	s.d.		%	s.d.		NC	s.d.		%	s.d.
	Bd21	10000	4201.2	AA		179.8	2.99333		40.5869	0.675694		0	0		0	0		0	0		0	0		263.2	2.99333		59.4131	0.675694
	Bd1-1	10000	5095.6	BB		0	0		0	0		0.4	0.489898		0.0902935	0.110586		177.4	3.2		40.0451	0.722348		265.2	3.31059		59.8646	0.747311
	Bd3-1	10000	4056	BB		1	0		0.225734	0		0.2	0.4		0.0451467	0.0902935		174.8	5.1923		39.4582	1.17208		267	5.36656		60.2709	1.21141
	Bd21-3	10000	3888.8	BB		0	0		0	0		0	0		0	0		156	4.60435		35.2144	1.03936		287	4.60435		64.7856	1.03936
	Bd30-1	10000	4630.2	BB		0	0		0	0		0	0		0	0		172.8	2.85657		39.0068	0.644824		270.2	2.85657		60.9932	0.644824
	Koz-1	10000	4114	BB		0.2	0.4		0.0451467	0.0902935		0	0		0	0		160.8	6.17738		36.298	1.39444		282	6.0663		63.6569	1.36937
	Koz-3	10000	4122	BB		0.2	0.4		0.0451467	0.0902935		0	0		0	0		153.2	4.87442		34.5824	1.10032		289.6	4.75815		65.3725	1.07407
	Koz-4	10000	4319	BB		0	0		0	0		0.2	0.4		0.0451467	0.0902935		172.2	7.35935		38.8713	1.66125		270.6	7.41889		61.0835	1.67469
	Bd21 × Bd3-1	10000	4507.6	AB		53.6	7.17217		12.0993	1.619		115.4	5.74804		26.0497	1.29753		10	1.78885		2.25734	0.403805		264	5.32917		59.5937	1.20297
	Bd21	20000	8424	AA		256	4.69042		57.7878	1.05878		1.8	2.22711		0.406321	0.502733		0	0		0	0		185.2	4.53431		41.8059	1.02355
	Bd1-1	20000	10206.6	BB		0	0		0	0		0.8	0.4		0.180587	0.0902935		251	2.96648		56.6591	0.669634		191.2	2.92575		43.1603	0.66044
	Bd3-1	20000	8143.8	BB		1	0		0.225734	0		0	0		0	0		274.2	5.77581		61.8962	1.30379		167.8	5.77581		37.8781	1.30379
	Bd21-3	20000	7865.6	BB		0	0		0	0		0.6	0.8		0.13544	0.180587		241.8	5.49181		54.5824	1.23969		200.6	5.23832		45.2822	1.18247
	Bd30-1	20000	9327.4	BB		0	0		0	0		0	0		0	0		262.6	2.6533		59.2777	0.598939		180.4	2.6533		40.7223	0.598939
	Koz-1	20000	8242.6	BB		0.2	0.4		0.0451467	0.0902935		0.6	0.8		0.13544	0.180587		238.4	5.53534		53.8149	1.24951		203.8	5.77581		46.0045	1.30379
	Koz-3	20000	8169.6	BB		0.2	0.4		0.0451467	0.0902935		0.8	0.748331		0.180587	0.168924		238.6	3.72022		53.86	0.839778		203.4	3.66606		45.9142	0.827553
	Koz-4	20000	8612.6	BB		0	0		0	0		0.2	0.4		0.0451467	0.0902935		262.4	6.88767		59.2325	1.55478		180.4	6.71118		40.7223	1.51494
	Bd21 × Bd3-1	20000	8969	AB		64.8	1.32665		14.6275	0.29947		216.6	5.4626		48.8939	1.23309		14.6	2.05913		3.29571	0.464814		147	3.34664		33.1828	0.755449
	Bd21	40000	16902	AA		313.4	1.49666		70.7449	0.337847		4.2	1.46969		0.948081	0.331759		0	0		0	0		125.4	1.35647		28.307	0.3062
	Bd1-1	40000	20378.6	BB		0.4	0.489898		0.0902935	0.110586		0.4	0.489898		0.0902935	0.110586		315	4.5607		71.1061	1.0295		127.2	5.15364		28.7133	1.16335
	Bd3-1	40000	16310.2	BB		1.2	0.4		0.27088	0.0902935		0.2	0.4		0.0451467	0.0902935		334.2	4.62169		75.4402	1.04327		107.4	4.17612		24.2438	0.942691
	Bd21-3	40000	15620.4	BB		0	0		0	0		0.8	0.4		0.180587	0.0902935		307.8	2.92575		69.4808	0.66044		134.4	2.72764		30.3386	0.615719
	Bd30-1	40000	18639.4	BB		0.6	0.489898		0.13544	0.110586		0.4	0.489898		0.0902935	0.110586		331.8	5.52811		74.8984	1.24788		110.2	5.15364		24.8758	1.16335
	Koz-1	40000	16482.6	BB		0.2	0.4		0.0451467	0.0902935		0.6	0.489898		0.13544	0.110586		295.2	2.78568		66.6366	0.628821		147	3.09839		33.1828	0.69941
	Koz-3	40000	16424.8	BB		0	0		0	0		1.6	0.8		0.361174	0.180587		315.2	2.31517		71.1512	0.522611		126.2	2.71293		28.4876	0.6124
	Koz-4	40000	17250.8	BB		0	0		0	0		0.2	0.4		0.0451467	0.0902935		335	2.82843		75.6208	0.638471		107.8	2.71293		24.3341	0.6124
	Bd21 × Bd3-1	40000	17883.2	AB		34.4	3.38231		7.76524	0.7635		311	6.32456		70.2032	1.42766		9.8	2.22711		2.21219	0.502733		87.8	2.22711		19.8194	0.502733
	Bd21	70000	29473.8	AA		347	3.03315		78.3296	0.684684		5.2	1.32665		1.17381	0.29947		0.2	0.4		0.0451467	0.0902935		90.6	3.00666		20.4515	0.678704
	Bd1-1	70000	35646.2	BB		0.4	0.489898		0.0902935	0.110586		1	0.632456		0.225734	0.142766		351	3.68782		79.2325	0.832465		90.6	3.55528		20.4515	0.802546
	Bd3-1	70000	28525.4	BB		1	0		0.225734	0		1	0.632456		0.225734	0.142766		363.4	1.62481		82.0316	0.366774		77.6	1.35647		17.5169	0.3062
	Bd21-3	70000	27317.4	BB		0.6	0.489898		0.13544	0.110586		0.2	0.4		0.0451467	0.0902935		356.2	1.93907		80.4063	0.437714		86	1.89737		19.4131	0.428299
	Bd30-1	70000	32640	BB		1.8	0.748331		0.406321	0.168924		1.6	0.8		0.361174	0.180587		361.2	5.26878		81.535	1.18934		78.4	5.2		17.6975	1.17381
	Koz-1	70000	28793.4	BB		0.2	0.4		0.0451467	0.0902935		1.6	0.8		0.361174	0.180587		335.8	3.1241		75.8014	0.705214		105.4	2.72764		23.7923	0.615719
	Koz-3	70000	28840.4	BB		0.2	0.4		0.0451467	0.0902935		1.4	0.8		0.316027	0.180587		355.4	2.8		80.2257	0.632054		86	2.89828		19.4131	0.654238
	Koz-4	70000	30186.4	BB		0.6	0.8		0.13544	0.180587		0.8	1.16619		0.180587	0.263248		373.4	2.57682		84.2889	0.581675		68.2	2.56125		15.395	0.57816
	Bd21 × Bd3-1	70000	31505.4	AB		21.6	3.00666		4.87585	0.678704		354.2	4.70744		79.9549	1.06263		7.6	1.0198		1.71558	0.230204		59.6	2.57682		13.4537	0.581675
	Bd21	100000	42143.6	AA		367.2	2.56125		82.8894	0.57816		5	0.894427		1.12867	0.201902		0	0		0	0		70.8	2.48193		15.9819	0.560256
	Bd1-1	100000	50868	BB		1.6	0.489898		0.361174	0.110586		0.6	0.8		0.13544	0.180587		366	2.68328		82.6185	0.605707		74.8	2.48193		16.8849	0.560256
	Bd3-1	100000	40591	BB		1.4	0.489898		0.316027	0.110586		1.2	0.748331		0.27088	0.168924		376	1.78885		84.8758	0.403805		64.4	2.05913		14.5372	0.464814
	Bd21-3	100000	39114.8	BB		0.6	0.489898		0.13544	0.110586		0.2	0.4		0.0451467	0.0902935		376.6	2.41661		85.0113	0.54551		65.6	2.41661		14.8081	0.54551
	Bd30-1	100000	46591	BB		2.2	1.16619		0.496614	0.263248		1.4	1.0198		0.316027	0.230204		378	2.28035		85.3273	0.514752		61.4	1.85472		13.86	0.418674
	Koz-1	100000	41240.6	BB		0.8	0.4		0.180587	0.0902935		2.6	1.0198		0.586907	0.230204		362.6	3.2619		81.851	0.736321		77	2.60768		17.3815	0.588641
	Koz-3	100000	41156.6	BB		0.4	0.489898		0.0902935	0.110586		1.6	0.8		0.361174	0.180587		371.4	1.62481		83.8375	0.366774		69.6	1.0198		15.7111	0.230204
	Koz-4	100000	43148.6	BB		0.8	0.4		0.180587	0.0902935		1.2	0.4		0.27088	0.0902935		392.8	3.37046		88.6682	0.760826		48.2	3.37046		10.8804	0.760826
	Bd21 × Bd3-1	100000	44907.2	AB		20	3.34664		4.51467	0.755449		370.8	4.79166		83.702	1.08164		6.8	2.31517		1.53499	0.522611		45.4	2.33238		10.2483	0.526497
	Bd21	150000	63276.8	AA		380.4	2.41661		85.8691	0.54551		8.8	0.979796		1.98646	0.221173		0	0		0	0		53.8	2.31517		12.1445	0.522611
	Bd1-1	150000	76276.4	BB		1.2	0.748331		0.27088	0.168924		1	0.894427		0.225734	0.201902		383.6	2.33238		86.5914	0.526497		57.2	2.71293		12.912	0.6124
	Bd3-1	150000	61113	BB		2.2	0.748331		0.496614	0.168924		1	0		0.225734	0		390.4	1.35647		88.1264	0.3062		49.4	1.0198		11.1512	0.230204
	Bd21-3	150000	58588.2	BB		0.4	0.489898		0.0902935	0.110586		1.6	0.489898		0.361174	0.110586		391.6	2.24499		88.3973	0.506771		49.4	2.57682		11.1512	0.581675
	Bd30-1	150000	69806	BB		1	0		0.225734	0		3.6	0.8		0.812641	0.180587		389.2	2.03961		87.8555	0.460408		49.2	2.48193		11.1061	0.560256
	Koz-1	150000	61732	BB		0.6	0.489898		0.13544	0.110586		1.8	1.16619		0.406321	0.263248		391	2.89828		88.2619	0.654238		49.6	3.49857		11.1964	0.789745
	Koz-3	150000	61715.2	BB		1	0		0.225734	0		2.4	0.8		0.541761	0.180587		381	0.632456		86.0045	0.142766		58.6	1.0198		13.228	0.230204
	Koz-4	150000	64673.8	BB		0.4	0.8		0.0902935	0.180587		2.4	0.8		0.541761	0.180587		404.4	1.0198		91.2867	0.230204		35.8	0.748331		8.08126	0.168924
	Bd21 × Bd3-1	150000	67365.6	AB		18.4	1.74356		4.1535	0.39358		385.6	2.6533		87.0429	0.598939		7.2	1.16619		1.62528	0.263248		31.8	2.63818		7.17833	0.595526
	Bd21	200000	84351.2	AA		389.2	2.78568		87.8555	0.628821		7.6	1.2		1.71558	0.27088		0	0		0	0		46.2	2.13542		10.4289	0.482035
	Bd1-1	200000	101706	BB		2	0		0.451467	0		1.6	0.8		0.361174	0.180587		394	3.03315		88.9391	0.684684		45.4	2.6533		10.2483	0.598939
	Bd3-1	200000	81223.6	BB		2	0.632456		0.451467	0.142766		1	0.632456		0.225734	0.142766		396.6	1.35647		89.526	0.3062		43.4	1.95959		9.79684	0.442346
	Bd21-3	200000	78008.6	BB		0.2	0.4		0.0451467	0.0902935		1.2	0.748331		0.27088	0.168924		399.2	1.83303		90.1129	0.413777		42.4	2.15407		9.57111	0.486245
	Bd30-1	200000	93062.8	BB		0.4	0.489898		0.0902935	0.110586		3.8	0.748331		0.857788	0.168924		396.4	0.489898		89.4808	0.110586		42.4	1.0198		9.57111	0.230204
	Koz-1	200000	82276.2	BB		0.4	0.489898		0.0902935	0.110586		2.8	0.979796		0.632054	0.221173		401.6	1.85472		90.6546	0.418674		38.2	1.32665		8.62302	0.29947
	Koz-3	200000	82382	BB		1.2	0.979796		0.27088	0.221173		3	1.09545		0.677201	0.247279		387.6	1.62481		87.4944	0.366774		51.2	0.979796		11.5576	0.221173
	Koz-4	200000	86109	BB		0	0		0	0		2.6	0.489898		0.586907	0.110586		410.2	1.93907		92.5959	0.437714		30.2	1.72047		6.81716	0.388367
	Bd21 × Bd3-1	200000	89812.2	AB		15	1.67332		3.386	0.377725		393.8	2.92575		88.8939	0.66044		7.6	1.35647		1.71558	0.3062		26.6	1.35647		6.00451	0.3062
	Bd21	400000	168750	AA		403.6	1.85472		91.1061	0.418674		9.8	0.4		2.21219	0.0902935		0	0		0	0		29.6	1.62481		6.68172	0.366774
	Bd1-1	400000	203660	BB		0.4	0.489898		0.0902935	0.110586		1.8	0.4		0.406321	0.0902935		409	1.26491		92.3251	0.285533		31.8	0.979796		7.17833	0.221173
	Bd3-1	400000	162579	BB		1.8	0.748331		0.406321	0.168924		2.6	0.8		0.586907	0.180587		409.8	1.93907		92.5056	0.437714		28.8	1.83303		6.50113	0.413777
	Bd21-3	400000	156237	BB		0.2	0.4		0.0451467	0.0902935		1.8	0.4		0.406321	0.0902935		414.4	1.35647		93.544	0.3062		26.6	1.35647		6.00451	0.3062
	Bd30-1	400000	186443	BB		0.4	0.489898		0.0902935	0.110586		3.4	0.8		0.767494	0.180587		412.6	0.8		93.1377	0.180587		26.6	1.0198		6.00451	0.230204
	Koz-1	400000	164827	BB		0.2	0.4		0.0451467	0.0902935		3.8	0.748331		0.857788	0.168924		416.8	1.72047		94.0858	0.388367		22.2	1.72047		5.01129	0.388367
	Koz-3	400000	164429	BB		0.2	0.4		0.0451467	0.0902935		4.2	0.4		0.948081	0.0902935		403.2	1.16619		91.0158	0.263248		35.4	1.2		7.99097	0.27088
	Koz-4	400000	172362	BB		0.6	0.489898		0.13544	0.110586		3.2	0.748331		0.722348	0.168924		416.6	1.0198		94.0406	0.230204		22.6	0.8		5.10158	0.180587
	Bd21 × Bd3-1	400000	179593	AB		9.8	1.6		2.21219	0.361174		407.4	1.35647		91.9639	0.3062		6	1.67332		1.3544	0.377725		19.8	0.748331		4.46953	0.168924
	Bd21	700000	294941	AA		410.4	1.85472		92.6411	0.418674		10.8	1.72047		2.43792	0.388367		0	0		0	0		21.8	1.46969		4.92099	0.331759
	Bd1-1	700000	356513	BB		0.2	0.4		0.0451467	0.0902935		1.8	0.4		0.406321	0.0902935		415	1.41421		93.6795	0.319236		26	1.41421		5.86907	0.319236
	Bd3-1	700000	284596	BB		1.2	0.4		0.27088	0.0902935		3.8	0.4		0.857788	0.0902935		414	0.894427		93.4537	0.201902		24	0.894427		5.41761	0.201902
	Bd21-3	700000	273667	BB		0	0		0	0		2	0		0.451467	0		420.8	0.4		94.9887	0.0902935		20.2	0.4		4.55982	0.0902935
	Bd30-1	700000	326100	BB		0.4	0.489898		0.0902935	0.110586		3.4	0.489898		0.767494	0.110586		417.6	0.8		94.2664	0.180587		21.6	0.8		4.87585	0.180587
	Koz-1	700000	288452	BB		0	0		0	0		4	0.632456		0.902935	0.142766		423.8	0.748331		95.6659	0.168924		15.2	1.16619		3.43115	0.263248
	Koz-3	700000	288259	BB		0	0		0	0		4.8	0.4		1.08352	0.0902935		412.8	2.31517		93.1828	0.522611		25.4	2.05913		5.73363	0.464814
	Koz-4	700000	301931	BB		0	0		0	0		4	0		0.902935	0		421.2	0.748331		95.079	0.168924		17.8	0.748331		4.01806	0.168924
	Bd21 × Bd3-1	700000	314258	AB		7.8	2.22711		1.76072	0.502733		413.2	2.13542		93.2731	0.482035		4.2	0.748331		0.948081	0.168924		17.8	0.4		4.01806	0.0902935
	Bd21	1000000	421339	AA		413.6	2.15407		93.3634	0.486245		10.6	0.489898		2.39278	0.110586		0	0		0	0		18.8	1.83303		4.24379	0.413777
	Bd1-1	1000000	509059	BB		0	0		0	0		2.2	0.4		0.496614	0.0902935		418.2	1.32665		94.4018	0.29947		22.6	1.0198		5.10158	0.230204
	Bd3-1	1000000	406433	BB		1.2	0.4		0.27088	0.0902935		3.8	0.4		0.857788	0.0902935		415.4	1.0198		93.7698	0.230204		22.6	1.0198		5.10158	0.230204
	Bd21-3	1000000	390967	BB		0	0		0	0		2	0		0.451467	0		422.4	0.489898		95.3499	0.110586		18.6	0.489898		4.19865	0.110586
	Bd30-1	1000000	465839	BB		0.4	0.489898		0.0902935	0.110586		4	1.26491		0.902935	0.285533		420.4	1.35647		94.8984	0.3062		18.2	1.46969		4.10835	0.331759
	Koz-1	1000000	412155	BB		0	0		0	0		4.2	0.4		0.948081	0.0902935		426	1.09545		96.1625	0.247279		12.8	0.748331		2.88939	0.168924
	Koz-3	1000000	411599	BB		0	0		0	0		5	0		1.12867	0		417.2	1.83303		94.1761	0.413777		20.8	1.83303		4.69526	0.413777
	Koz-4	1000000	430635	BB		0	0		0	0		4	0.632456		0.902935	0.142766		425	1.41421		95.9368	0.319236		14	1.26491		3.16027	0.285533
	Bd21 × Bd3-1	1000000	449258	AB		7.8	1.16619		1.76072	0.263248		413	1.89737		93.228	0.428299		4.8	0.748331		1.08352	0.168924		17.4	0.489898		3.92777	0.110586
	Bd21	2000000	842233	AA		417.4	0.489898		94.2212	0.110586		11	0.632456		2.48307	0.142766		0	0		0	0		14.6	0.489898		3.29571	0.110586
	Bd1-1	2000000	1.01807e+06	BB		0	0		0	0		2	0		0.451467	0		423	0.632456		95.4853	0.142766		18	0.632456		4.06321	0.142766
	Bd3-1	2000000	812948	BB		1	0		0.225734	0		4	0		0.902935	0		418.4	0.489898		94.447	0.110586		19.6	0.489898		4.42438	0.110586
	Bd21-3	2000000	781707	BB		0	0		0	0		2	0		0.451467	0		425.2	0.748331		95.9819	0.168924		15.8	0.748331		3.56659	0.168924
	Bd30-1	2000000	931057	BB		0	0		0	0		4.6	0.8		1.03837	0.180587		421.8	0.748331		95.2144	0.168924		16.6	0.489898		3.74718	0.110586
	Koz-1	2000000	823699	BB		0	0		0	0		4	0		0.902935	0		427	0		96.3883	0		12	0		2.7088	0
	Koz-3	2000000	823082	BB		0	0		0	0		5	0		1.12867	0		421.4	0.489898		95.1242	0.110586		16.6	0.489898		3.74718	0.110586
	Koz-4	2000000	861836	BB		0	0		0	0		4	0		0.902935	0		428.6	0.489898		96.7494	0.110586		10.4	0.489898		2.34763	0.110586
	Bd21 × Bd3-1	2000000	898539	AB		7.6	1.0198		1.71558	0.230204		417	0.894427		94.1309	0.201902		4.4	0.489898		0.993228	0.110586		14	1.09545		3.16027	0.247279
	Bd21	3000000	1.26418e+06	AA		419.6	0.489898		94.7178	0.110586		11.4	0.489898		2.57336	0.110586		0	0		0	0		12	0		2.7088	0
	Bd1-1	3000000	1.52735e+06	BB		0	0		0	0		2	0		0.451467	0		423.8	0.4		95.6659	0.0902935		17.2	0.4		3.88262	0.0902935
	Bd3-1	3000000	1219122	BB		1	0		0.225734	0		4	0		0.902935	0		420.4	0.489898		94.8984	0.110586		17.6	0.489898		3.97291	0.110586
	Bd21-3	3000000	1.17282e+06	BB		0	0		0	0		2	0		0.451467	0		427.2	0.748331		96.4334	0.168924		13.8	0.748331		3.11512	0.168924
	Bd30-1	3000000	1.39718e+06	BB		0.2	0.4		0.0451467	0.0902935		3.4	0.8		0.767494	0.180587		424	1.41421		95.7111	0.319236		15.4	1.0198		3.4763	0.230204
	Koz-1	3000000	1235952	BB		0	0		0	0		4	0		0.902935	0		427	0		96.3883	0		12	0		2.7088	0
	Koz-3	3000000	1.23501e+06	BB		0	0		0	0		5	0		1.12867	0		423.6	0.489898		95.6208	0.110586		14.4	0.489898		3.25056	0.110586
	Koz-4	3000000	1.29235e+06	BB		0	0		0	0		4	0		0.902935	0		429.8	0.4		97.0203	0.0902935		9.2	0.4		2.07675	0.0902935
	Bd21 × Bd3-1	3000000	1.34755e+06	AB		8.6	1.49666		1.94131	0.337847		419.4	0.8		94.6727	0.180587		4.6	1.35647		1.03837	0.3062		10.4	1.0198		2.34763	0.230204
